# Supplementary material for: Examining the health and functioning status of medical laboratory professionals in Ontario, Canada: an exploratory study during the COVID-19 pandemic
Source: HighWire-hosted journal article supplement (doi:10.1136/bmjopen-2023-074384), 2023-11-01
Supplement: bmjopen-2023-074384supp003_data_supplement.pdf [file bmjopen-2023-074384supp003_data_supplement.pdf]

**Supplemental Table 3**

Demographics of Medical Laboratory Assistants (n= 51)

|                                                              | <b>Variable</b>       | <b>Frequency</b> | <b>Percentage</b> |
|--------------------------------------------------------------|-----------------------|------------------|-------------------|
| <b>Gender (n= 51 )</b>                                       | Women                 | 45               | 88.24             |
|                                                              | Men                   | 5                | 9.80              |
|                                                              | Other                 | 1                | 1.96              |
| <b>Age (n= 48)</b>                                           | 21-31                 | 10               | 20.83             |
|                                                              | 32-42                 | 17               | 35.42             |
|                                                              | 43-53                 | 16               | 33.33             |
|                                                              | 54-64                 | 5                | 10.42             |
| <b>Marital Status (n= 50)</b>                                | Single                | 10               | 20.00             |
|                                                              | Married/Committed     | 39               | 78.00             |
|                                                              | Relationship          |                  |                   |
|                                                              | Other                 | 1                | 2.00              |
| <b>Ethnicity (n= 52)</b>                                     | White/Caucasian       | 40               | 76.92             |
|                                                              | Other                 | 12               | 23.08             |
| <b>Number of children (n= 48)</b>                            | 0                     | 25               | 52.08             |
|                                                              | 1-2                   | 21               | 43.75             |
|                                                              | 3-5                   | 2                | 4.17              |
| <b>Work accommodation due to physical disability (n= 51)</b> | Yes                   | 0                | 0                 |
|                                                              | No                    | 48               | 94.12             |
|                                                              | Choose not to answer  | 3                | 5.88              |
| <b>Workplace COVID-19 guidelines taken seriously (n= 51)</b> | Always                | 29               | 56.86             |
|                                                              | Most/half of the time | 22               | 43.13             |
|                                                              | Sometimes/never       | 0                | 0                 |

|                                                    |                              |    |       |
|----------------------------------------------------|------------------------------|----|-------|
| <b>Employment status (n= 58)</b>                   | Full time                    | 36 | 62.07 |
|                                                    | Part-time                    | 19 | 32.76 |
|                                                    | Other                        | 3  | 5.17  |
| <b>Trust in employer to ensure safety (n= 51 )</b> | Always                       | 14 | 27.45 |
|                                                    | Most/half of the time        | 33 | 64.71 |
|                                                    | Sometimes/never              | 4  | 7.84  |
| <b>Highest level of education (n= 54 )</b>         | Trade certificate/diploma    | 14 | 25.93 |
|                                                    | from vocational school       |    |       |
|                                                    | Community college graduate   | 27 | 50.00 |
|                                                    | University certificate       | 3  | 5.56  |
|                                                    | below bachelors              |    |       |
|                                                    | University Bachelor's degree | 8  | 14.81 |
|                                                    | Other                        | 2  | 3.70  |
